# Supplementary material for: Enhancing high-temperature storage performance for the commercial lithium-ion battery via an effective additive strategy
Source: Royal Society of Chemistry journal article supplement (doi:10.1039/d3nj03574c), 2023-01-01
Supplement: d3nj03574c1.pdf [file d3nj03574c1.pdf]

## Supporting Information

### **Enhancing high-temperature storage performance for the commercial lithium-ion battery via an effective additive strategy**

Weigang Liu<sup>a</sup>, Shuai Gao<sup>a</sup>, Jingqiang Zheng<sup>a</sup>, Zhi Zhang<sup>a,c,f\*</sup>, Jiahao Gu<sup>a</sup>, Zhiyong Chen<sup>c</sup>, Hao Jiang<sup>c</sup>, Bo Hong<sup>a,d,e</sup>, Jie Li<sup>a,d,e</sup>, Xinming Fan<sup>a,b\*</sup>

<sup>a</sup> School of Metallurgy and Environment, Central South University, Changsha, 410083, PR China

<sup>b</sup> Powder Metallurgy Research Institute, Central South University, Changsha 410083, Hunan, China

<sup>c</sup> Guangdong Mic-power New Energy Co., Ltd, Huizhou, 516000, PR China

<sup>d</sup> Engineering Research Centre of Advanced Battery Materials, The Ministry of Education, Changsha 410083, Hunan, China

<sup>e</sup> Hunan Provincial Key Laboratory of Value-added Metallurgy, Changsha 410083, Hunan, China

<sup>f</sup> Hunan Provincial Key Laboratory of Water Treatment Functional Materials, College of Chemistry and Materials Engineering, Hunan University of Arts and Science, Changde 415000, PR China.

**This file includes:**

Figure S1-4

Tables S1-8

**Table S1** Formulation of STD and after addition to STD

| Main solvents (100%)       |                             |                              |                          | Lithium salt      | Additives<br>(Quality ratio) |
|----------------------------|-----------------------------|------------------------------|--------------------------|-------------------|------------------------------|
| Ethylene carbonate<br>(EC) | Propylene carbonate<br>(PC) | Propyl phenylacetate<br>(PP) | Ethyl propionate<br>(EP) | LiPF <sub>6</sub> | MMDS                         |
| 30%                        | 10%                         | 50%                          | 10%                      | 1.2mol/L          | 0%                           |
| 30%                        | 10%                         | 50%                          | 10%                      | 1.2mol/L          | 0.5%                         |
| 30%                        | 10%                         | 50%                          | 10%                      | 1.2mol/L          | 1%                           |
| 30%                        | 10%                         | 50%                          | 10%                      | 1.2mol/L          | 1.5%                         |

**Table S2** Electrical performance data from different mass ratios of MMDS which are added to the STD after storage under 100%SOC

| ratio (%) | Voltage (V) | Initial capacity (mAh) | Storage capacity (mAh) | Storage time (month) | Voltage (V) | Retained capacity (mAh) | Recovered capacity (mAh) | Capacity retention (%) | Capacity recovery (%) |
|-----------|-------------|------------------------|------------------------|----------------------|-------------|-------------------------|--------------------------|------------------------|-----------------------|
| STD       | 4.187       | 61.9                   | 61.9                   |                      | 4.137       | 54.2                    | 59.6                     | 87.56                  | 96.28                 |
| 0.5       | 4.185       | 67.4                   | 67.4                   | 1                    | 4.126       | 59.5                    | 64.4                     | 88.28                  | 95.55                 |
| 1.0       | 4.185       | 66.7                   | 66.7                   |                      | 4.126       | 59.4                    | 64.5                     | 89.06                  | 96.70                 |
| 1.5       | 4.185       | 67.5                   | 67.5                   |                      | 4.185       | 59.4                    | 64.3                     | 88.00                  | 95.26                 |
| STD       | 4.19        | 62.3                   | 62.3                   |                      | 4.114       | 52.5                    | 58.1                     | 84.27                  | 93.26                 |
| 0.5       | 4.185       | 67.4                   | 67.4                   | 2                    | 4.108       | 56.9                    | 63.2                     | 84.42                  | 93.77                 |
| 1.0       | 4.185       | 67.2                   | 67.2                   |                      | 4.108       | 56.7                    | 63.1                     | 84.78                  | 93.90                 |
| 1.5       | 4.185       | 67.3                   | 67.3                   |                      | 4.108       | 56.6                    | 62.9                     | 84.10                  | 93.46                 |
| STD       | 4.188       | 60.5                   | 60.5                   |                      | 4.095       | 47.2                    | 54.8                     | 78.02                  | 90.58                 |
| 0.5       | 4.185       | 67.2                   | 67.2                   | 3                    | 4.09        | 54.1                    | 62.0                     | 80.51                  | 92.26                 |
| 1.0       | 4.185       | 67.4                   | 67.4                   |                      | 4.093       | 54.7                    | 62.4                     | 81.16                  | 92.58                 |
| 1.5       | 4.185       | 66.7                   | 66.7                   |                      | 4.093       | 53.8                    | 61.2                     | 80.66                  | 91.75                 |

**Table S3** Electrical performance data from different mass ratios of MMDS which are added to the STD after storage under 30%SOC

| Ratio (%) | Voltage (V) | Initial capacity (mAh) | Storage capacity (mAh) | Storage time (month) | Voltage (V) | Retained capacity (mAh) | Recovered capacity (mAh) | Capacity retention (%) | Capacity recovery (%) |
|-----------|-------------|------------------------|------------------------|----------------------|-------------|-------------------------|--------------------------|------------------------|-----------------------|
| STD       | 4.187       | 61.9                   | 61.9                   |                      | 4.137       | 54.2                    | 59.6                     | 87.56                  | 96.28                 |
| 0.5       | 4.185       | 67.4                   | 67.4                   | 1 month              | 4.126       | 59.5                    | 64.4                     | 88.28                  | 95.55                 |
| 1.0       | 4.185       | 66.7                   | 66.7                   |                      | 4.126       | 59.4                    | 64.5                     | 89.06                  | 96.70                 |
| 1.5       | 4.185       | 67.5                   | 67.5                   |                      | 4.185       | 59.4                    | 64.3                     | 88.00                  | 95.26                 |
| STD       | 4.19        | 62.3                   | 62.3                   |                      | 4.114       | 52.5                    | 58.1                     | 84.27                  | 93.26                 |
| 0.5       | 4.185       | 67.4                   | 67.4                   | 2 months             | 4.108       | 56.9                    | 63.2                     | 84.42                  | 93.77                 |
| 1.0       | 4.185       | 67.2                   | 67.2                   |                      | 4.108       | 56.7                    | 63.1                     | 84.38                  | 93.90                 |
| 1.5       | 4.185       | 67.3                   | 67.3                   |                      | 4.108       | 56.6                    | 62.9                     | 84.10                  | 93.46                 |
| STD       | 4.188       | 60.5                   | 60.5                   |                      | 4.0948      | 47.2                    | 54.8                     | 78.02                  | 90.58                 |
| 0.5       | 4.185       | 67.2                   | 67.2                   | 3 months             | 4.09        | 54.1                    | 62.0                     | 80.51                  | 92.26                 |
| 1.0       | 4.185       | 67.4                   | 67.4                   |                      | 4.093       | 54.7                    | 62.4                     | 81.16                  | 92.58                 |
| 1.5       | 4.185       | 66.7                   | 66.7                   |                      | 4.0927      | 53.8                    | 61.2                     | 80.66                  | 91.75                 |

**Table S4** Battery performance with the STD and 1% MMDS after 900 cycles.

| Electrolyte | Initial<br>capacity | Capacity value<br>after cycling | Coulombic efficiency<br>(%) | Capacity retention<br>(%) |
|-------------|---------------------|---------------------------------|-----------------------------|---------------------------|
| STD         | 71.6                | 65.0                            | 99.98                       | 90.78                     |
| 1% MMDS     | 71.6                | 66.4                            | 99.99                       | 92.74                     |

**Table S5** Electrical performance data of the batteries with and without MMDS additive

| Initial capacity (mAh) | Storage capacity (mAh) | SOC  | Electrolyte | Storage time (month) | Retained capacity/mAh | Recovered capacity/mAh | Capacity retention change ratio | Capacity recovery change ratio |
|------------------------|------------------------|------|-------------|----------------------|-----------------------|------------------------|---------------------------------|--------------------------------|
| 61.9                   | 61.9                   |      |             | 1                    | 54.2                  | 59.6                   | 87.56%                          | 96.28%                         |
| 62.3                   | 62.3                   |      | STD         | 2                    | 52.5                  | 58.1                   | 84.27%                          | 93.26%                         |
| 60.5                   | 60.5                   |      |             | 3                    | 47.2                  | 54.2                   | 78.02%                          | 89.59%                         |
| 66.7                   | 66.7                   | 100% |             | 1                    | 59.4                  | 64.5                   | 89.06%                          | 96.70%                         |
| 67.2                   | 67.2                   |      | 1%MMDS      | 2                    | 57.9                  | 63.3                   | 86.16%                          | 94.20%                         |
| 67.4                   | 67.4                   |      |             | 3                    | 54.7                  | 62.4                   | 81.16%                          | 92.58%                         |
| 62.1                   | 18.6                   |      |             | 1                    | 15                    | 60                     | 94.20%                          | 96.62%                         |
| 65.4                   | 19.6                   |      | STD         | 2                    | 12.3                  | 61.7                   | 88.84%                          | 94.34%                         |
| 62.8                   | 18.8                   |      |             | 3                    | 8.7                   | 56.8                   | 83.92%                          | 90.45%                         |
| 67.4                   | 20.1                   | 30%  |             | 1                    | 16.6                  | 65.7                   | 94.81%                          | 97.48%                         |
| 67.4                   | 20.1                   |      | 1%MMDS      | 2                    | 14.1                  | 64.5                   | 91.10%                          | 95.70%                         |
| 66.9                   | 20.1                   |      |             | 3                    | 11                    | 62.5                   | 86.40%                          | 93.42%                         |

**Table S6.** Data of EIS of 30%SOC and 100%SOC stored for 3 months of the batteries

| Samples           | $R_s(\Omega)$ | $R_f(\Omega)$ | $R_{ct}(\Omega)$ |
|-------------------|---------------|---------------|------------------|
| STD-30%SOC        | 0.38          | 0.572         | 1.19             |
| STD-100%SOC       | 0.483         | 0.528         | 1.13             |
| 1% MMDS-30% SOC   | 0.348         | 0.622         | 1.81             |
| 1% MMDS -100% SOC | 0.436         | 0.607         | 1.72             |



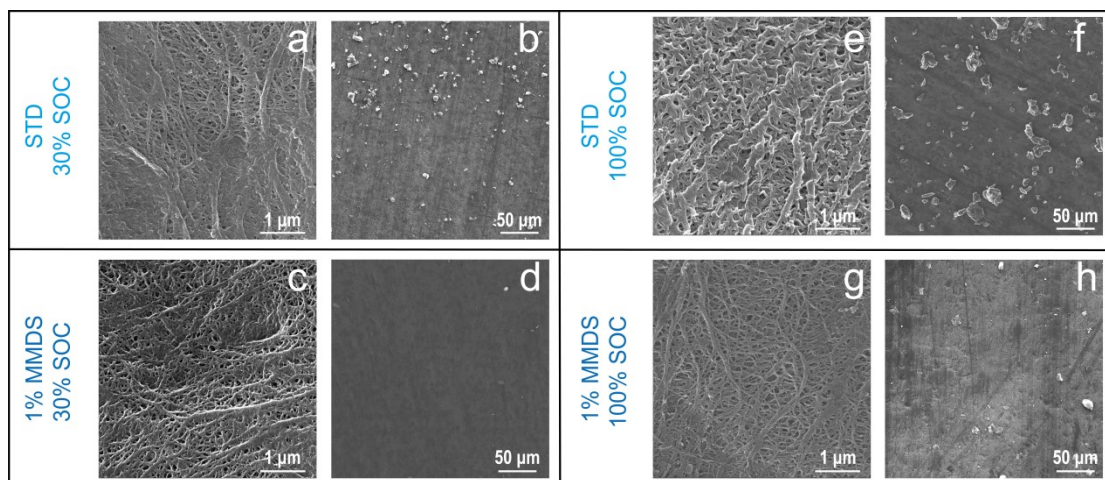

**Figure S1 (a,b)** Scanning electron microscopy of separator in 1 $\mu$ m and 50  $\mu$ m under 30%SOC stored for 3 months in STD. **(c,d)** SEM of separator in 1 $\mu$ m and 50  $\mu$ m under 30%SOC stored for 3 months after addition to STD. **(e,f)** Under 100%SOC stored for 3 months in STD. **(g,h)** Under 100%SOC stored for 3 months after addition to STD.

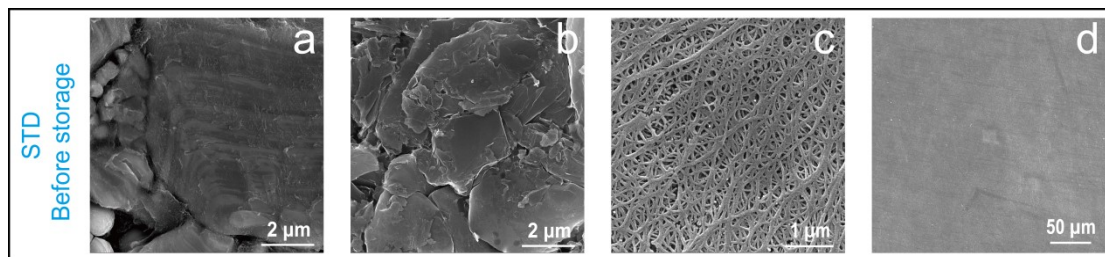

**Figure S2 a,b,c,d:** Cathode, anode, separator in 1μm and 50 μm in STD before storage.

**Table S7** The errors of the Atomic Absorption Spectrometer method in the quantitative determination of lithium content

| Number of samples | Sample composition              | Purity quotient | Lithium content in samples | Measured Li content by atomic absorption spectrometer method | Test error of atomic absorption spectrometer method |
|-------------------|---------------------------------|-----------------|----------------------------|--------------------------------------------------------------|-----------------------------------------------------|
| Number 1          |                                 |                 |                            | 18.66%                                                       | 0.67%                                               |
|                   | Li <sub>2</sub> CO <sub>3</sub> | 99.99%          | 18.7855%                   |                                                              |                                                     |
| Number 2          |                                 |                 |                            | 18.87%                                                       | 0.45%                                               |

**Table S8** Date of dead lithium and cobalt in the anode stored for 3 months at 45 °C in STD and after addition to STD

| SO C | Storage time | Electrolyte    | Weight of anode piece/mg | Weight of copper foil/mg | Net weight of anode/mg | Constant volume/mL | Lithium mass in the anode/mg | Cobalt mass in the anode/mg | The proportion of dead Li in the anode | The proportion of Co in the anode |
|------|--------------|----------------|--------------------------|--------------------------|------------------------|--------------------|------------------------------|-----------------------------|----------------------------------------|-----------------------------------|
| 30%  |              |                | 52.7                     |                          | 36.26                  |                    | 0.448                        | 0.018                       | 1.450%                                 | 0.066%                            |
|      |              | STD            |                          |                          |                        |                    |                              |                             |                                        |                                   |
| 100% |              |                | 52.2                     |                          | 35.76                  |                    | 0.454                        | 0.02                        | 1.490%                                 | 0.074%                            |
|      | 3 months     |                |                          | 16.44                    |                        | 100mL              |                              |                             |                                        |                                   |
| 30%  |              | After addition | 45.6                     |                          | 29.16                  |                    | 0.267                        | 0.01                        | 1.074%                                 | 0.045%                            |
| 100% |              |                | 55                       |                          | 38.56                  |                    | 0.358                        | 0.014                       | 1.089%                                 | 0.048%                            |

The detail theoretical calculation process is as follows:

The geometry optimization, frequencies and density functional theory (DFT) chemical description for the molecular structures of all title compounds were performed using Gaussian09 program[1] package with M062X exchange-correlation functional and 6-311+G\*\* basis set[2,3] for all atoms. In this work, temperature (45°C) were considered to calculate the thermodynamic data. Harmonic vibration frequency calculations were performed for all stationary points to confirm them as a local minima (zero imaginary frequencies). Orbital composition analysis employed by Multiwfn program[4,5]. The thermochemical corrections for the Gibbs free energies were derived at 298.15 K and 318.15 K (45°C) using Shermo\_2.4[6]. The interaction energy of species (EC, EP, PP, PC, and MMDS) and LiPF<sub>6</sub> is given as:

$$\Delta E_{\text{int}} = E_{\text{complex}} - E_{\text{species}} - E_{\text{LiPF}_6}$$

Where the  $E_{\text{complex}}$ ,  $E_{\text{species}}$ ,  $E_{\text{LiPF}_6}$  represents for the energy of species-LiPF<sub>6</sub> complexes, EC, PC and MMDS etc, and LiPF<sub>6</sub>.

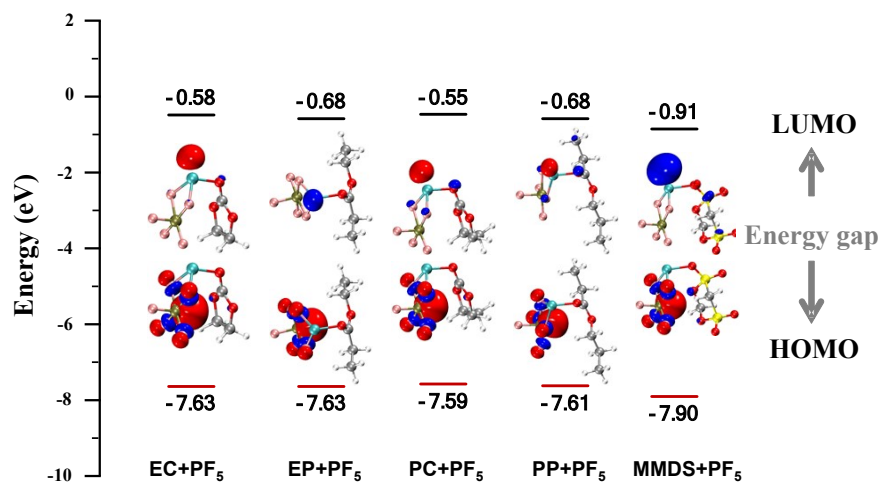

**Fig. S3** LUMO and HOMO energy level analysis of EC+PF<sub>5</sub>, EP+PF<sub>5</sub>, PC+PF<sub>5</sub>, PP+PF<sub>5</sub>, and MMDS+PF<sub>5</sub>.

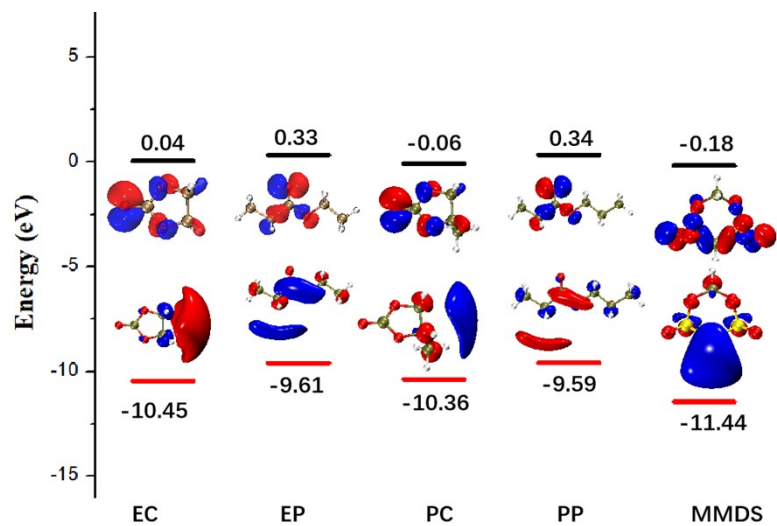

**Fig. S4** LUMO and HOMO energy level analysis of EC, EP, PC, PP, and MMDS.

## References:

- [1] Gaussian 09, Revision A.02; Frisch, M. J.; Trucks, G. W.; Schlegel, H. B.; Scuseria, G. E.; Robb, M. A.; Cheeseman, J. R.; Scalmani, G.; Barone, V.; Mennucci, B.; Petersson, G. A.; et al. Gaussian, Inc.: Wallingford, CT, 2009.
- [2] C. Lee, W. Yang, R. Parr, *Phys. Rev. B*, 1988, **37**, 785–789.
- [3] R. Ditchfield, W. Hehre, J. Pople, *J. Chem. Phys.*, 1971, **54**, 724-728.
- [4] T. Lu, F.W. Chen, *J. Comput. Chem.*, 2012, **33**, 580-592.
- [5] T. Lu, F.W. Chen, *Acta Phys. -Chim. Sin.*, 2011, **27**, 2786-2792.
- [6] T. Lu, F.W. Chen, *Comput. Theor. Chem.*, 2021, **1200**, 113249.
